# Supplementary material for: The Impact of the Australasian ‘Health Star Rating’, Front-of-Pack Nutritional Label, on Consumer Choice: A Longitudinal Study
Source: Nutrients. 2018 Jul 16;10(7):906. doi: 10.3390/nu10070906 (PMC6073628; doi:10.3390/nu10070906)
Supplement: Supplementary file 1 [file nutrients-10-00906-s001.xlsx]

## Sheet: Mosgiel
	Code	Code	Code	Code	Code	Code
	A = 0 B= 1	A = 0 B= 1	1 = yes 0 = no	1 = yes 0 = no	Direct entry	1 = male 0 = fem
Group1	Pair 1	Pair 2	Regular Store	Regular cereal	Age	Gender
1	1	1	1	1	60	0
2	1	1	1	1	40	1
3	1	0	1	1	35	0
4	1	1	1	1	80	0
5	1	0	1	1	60	0
6	0	0	1	1	80	0
7	0	1	1	1	80	0
8	1	1	1	1	35	0
9	0	0			40	0
10	0	1	1	1	30	0
11	1	1	1	1	40	0
12	1	0	1	1	65	1
13	0	1	0	1	35	0
14	1	1	0	1	80	1
15	1	1	0	1	65	0
16	1	1	0	0
17	0	1	0	0	20	0
18	0	1	1	0
19	0	1	1	0	65	0
20	1	1	1	0	25	0
Group 2	Pair 1	Pair 2	Regular Store	Regular cereal	Age	Gender
1	0	0	1	1	65	0
2	0	0	1	1	80	1
3	1	1	1	1	35	0
4	0	1	1	1	80	0
5	0	0	1	0	25	1
6	1	1	1	0	25	0
7	1	1	1	0	66	1
8	1	1	1	1	55	0
9	0	0	1	1	75	0
10	0	1	1	1	20	0
11	1	0	1	1	70	0
12	0	1	1	1	68	0
13	0	1	1	1	30	0
14	1	1	1	1	80	0
15	0	1	1	0	55	0
16	0	1	1	1	55	0
17	1	0	1	1	70	0
18	0	0	0	1	20	1
19	0	0	1	1	35	0
20	0	1	1	1	40	1
Group 3	Pair 1	Pair 2	Regular Store	Regular cereal	Age	Gender
1	0	0	1	1	80	0
2	0	1	1	1	40	0
3	1	0	1	1	70	0
4	0	1	1	1	50	0
5	0	1	1	1	65	0
6	1	1	1	1	45	0
7	0	1	1	0	40	0
8	1	1	0	0	45	0
9	0	1	1	1	28	0
10	1	0	1	1	60	1
11	1	1	1	1	60	0
12	0	1	1	1
13	0	0	1	1	70	0
14	1	1	0	1	55	0
15	1	1	1	1	45	0
16	0	1	1	1	80	0
17	1	1	1	1	28	0
18	1	1	1	1
19	1	0	1	0	70	1
20	0	1	0	1	50	0
Group 4	Pair 1	Pair 2	Regular Store	Regular cereal	Age	Gender
1	1	1	1	1	70	1
2	0	0	1	1	35	0
3	0	0	1	0
4	0	1	1	1	50	0
5	0	1	1	1
6	1	0	1	1
7	0	1	1	1	75	0
8	0	1	1	0
9	1	0	1	0	40	0
10	0	1	1	1	60	0
11	1	1	1	0	20	1
12	1	1	0	1	18	1
13	0	1	1	1	65	1
14	1	1	1	1	65	1
15	1	1	0	1	60	0
16	0	1	1	0	50	1
17	0	1	1	1	50	0
18	1	1	1	1	60	0
19	0	1	1	1	40	0
20	0	1	1	0	70	0
Group 5	Pair 1	Pair 2	Regular Store	Regular cereal	Age	Gender
1	0	0	1	0	70	0
2	0	1	1	0	55	0
3	1	1	1	1	35	0
4	0	1	1	1	60	0
5	1	1	1	0	33	0
6	0	1	1	1	40	1
7	1	1	1	0	55	1
8	0	1	1	1	33	0
9	0	1	1	1	65	2
10	0	1	0	1	63	0
11	1	1	0	1
12	0	1	1	1	60	0
13	1	1	0	1
14	0	1	1	1	50	0
15	0	0	1	1
16	0	1	1	1	50	0
17	0	0	1	1	80	0
18	0	1	1	1	58	0
19
20
Group 6	Pair 1	Pair 2	Regular Store	Regular cereal	Age	Gender
1	1	0	1	1	70	0
2	0	0	1	0	26	0
3	1	0	0	1	40	0
4	1	0	0	1	66	0
5	1	1	1	1	58	0
6	1	1	0	1	65	0
7	0	0	1	1	80	0
8	1	1	1	1	85	1
9	1	1	0	0	70	0
10	1	1	1	1	70	0
11	1	0	1	1	60	0
12	1	0	1	0
13	1	1	1	1	55	0
14	0	0	1	1	45	0
15	1	0	1	1
16	0	1	1	0	70	0
17	1	1	1	0	40	0
18	1	1	1	1	35	0
19	1	1	1	1	70	0
20	0	0	1	0	60	0
Group 7	Pair 1	Pair 2	Regular Store	Regular cereal	Age	Gender
1	1	1	1	1	70	1
2	1	0	0	0	25	0
3	1	1	1	1	60	1
4	1	1	1	0	70	1
5	1	0	1	0	44	0
6	0	1	1	1	70	0
7	1	1	1	1	85	1
8	1	1	1	1	54	0
9	0	0	1	0	80	0
10	1	1	1	1	52	0
11	1	1	1	1	70	0
12	1	0	1	1	48	1
13	1	0	1	1	80	1
14	0	1	1	1	17	0
15	1	0	1	1	45	0
16	1	0	1	0	65	0
17	1	1	1	1	40	1
18	0	1	1	1	60	1
19	0	0	1	1	70	0
20	1	1	1	1	56	0
Group 8	Pair 1	Pair 2	Regular Store	Regular cereal	Age	Gender
1	0	0	1	1	59	1
2	1	1	1	1	60	0
3	1	1	1	1	40	0
4	0	1	1	1	62	0
5	0	0	1	1	70	0
6	1	1	1	1	25	0
7	1	1	0	1
8	1	1	1	1	72	0
9	1	0	1	1	45	0
10	1	0	1	1	70	0
11	1	1	1	1	56	0
12	1	0	1	1
13	1	1	1	0
14	1	1	1	0	65	0
15	0	0	1	1	47	0
16	1	0	1	0	60	1
17	1	0	1	1	45	0
18	1	1	1	1	49	0
19	1	0	1	0	60	0
20	0	0	1	1	75	0
Group 9	Pair 1	Pair 2	Regular Store	Regular cereal	Age	Gender
1	1	0	1	1	39	0
2	1	1	1	1	80	0
3	0	0	1	0	60	0
4	0	0	1	1	73	0
5	1	1	1	0	35	1
6	1	1	0	1	85	1
7	1	0	0	0	56	1
8	1	1	1	1	60	0
9	1	1	1	1	60	1
10	0	0	1	1	62	0
11	1	0	1	0	70	0
12	1	0	1	1	60	0
13	1	1	1	1	55	1
14	1	0	1	1	30	0
15	1	0	1	1	56	0
16	1	1	1	1	70	1
17	0	1	0	1	58	0
18	1	0	0	1	60	0
19	0	0	1	0	60	0
20
Group 10	Pair 1	Pair 2	Regular Store	Regular cereal	Age	Gender
1	0	1	1	1	20	1
2	1	1	1	0	50	1
3	1	0	1	1	80	0
4	0	0	1	1	45	0
5	1	1	1	1	70	1
6	1	1	1	0	70	0
7	1	1	1	1	67	1
8	1	0	1	1	37	0
9	1	1	1	1
10	1	0	1	0	55	0
11	0	1	1	1	70	0
12	1	1	1	0	16	1
13	1	1	1	1	60	0
14	0	0	1	1
15	1	1	1	1	50	0
16	0	0	1	1	65	0
17	1	0	1	1	70	0
18	1	1	1	1	70	0
19	1	1	1	1	36	1
20	1	0	1	1	67	1

## Sheet: Center City 1
Centre City New World (I)
	Code	Code	Code	Code	Code	Code
	A = 0 B= 1	A = 0 B= 1	1 = yes 0 = no	1 = yes 0 = no	Direct entry	1 = male 0 = fem
Group1	Pair 1	Pair 2	Regular Store	Regular cereal	Age	Gender
1	1	1	1	0	50	0
2	0	0	1	0	42	1
3	1	1	1	1	70	1
4	1	1	1	0	40	0
5	1	0	1	1	70	0
6	0	0	1	1	40	0
7	1	1	0	0	21	0
8	1	1	1	0	20	0
9	0	1	1	1	40	1
10	1	1	1	1	70	1
11	0	1	1	1	28	0
12	1	0	1	1	40	0
13	1	1	0	1	45	0
14	1	1	0	1	48	0
15	0	1	0	1	50	0
16	0	1	1	1	60	1
17	1	1	1	1	50	1
18	1	1	1	0	40	1
19	1	1	1	1	25	0
20	1	1	1	1	50	0
Group 2	Pair 1	Pair 2	Regular Store	Regular cereal	Age	Gender
1	0	0	0	1	45	0
2	0	0	0	0	40	0
3	0	1	1	1	75	0
4	0	1	1	1	40	0
5	0	0	1	1	60	0
6	1	0	1	1	75	1
7	0	1	1	1	28	1
8	0	1	1	0	22	0
9	1	0	1	1	80	0
10	0	1	0	1	80	0
11	1	0	1	0	45	0
12	1	1	1	1	40	0
13	1	0	1	0	18	0
14	0	1	1	1	50	0
15	0	1	1	0	20	0
16	0	1	1	0	20	1
17	1	1	1	1	80	0
18	1	1	1	1	40	0
19	0	1	1	1	40	0
20	0	1	1	1	40	0
Group 3	Pair 1	Pair 2	Regular Store	Regular cereal	Age	Gender
1	0	1	1	0	70	1
2	1	1	1	1	70	0
3	1	1	0	0	80	0
4	1	1	0	0	60	0
5	1	1	1	1	50	1
6	0	0	1	1	45	0
7	1	1	0	1	60	1
8	0	1	1	1
9	0	1	1	1	66	0
10	1	1	1	1	50	0
11	1	1	1	0	30	1
12	1	1	1	0	50	0
13	1	1	1	0	70	0
14	0	1	0	0	40	1
15	1	0	1	1	35	1
16	0	1	1	0	70	0
17	0	1	1	0
18	0	0	1	1	50	0
19	0	0	1	1	40	1
20	0	1	1	1	75	0
Group 4	Pair 1	Pair 2	Regular Store	Regular cereal	Age	Gender
1	1	1	1	1
2	0	1	0	1
3	0	1	1	1	50	0
4	0	1	1	1	50	1
5	0	1	1	0	20	0
6	0	1	1	0	50	1
7	1	0	0	0	80	0
8	1	0	1	1	52	0
9	1	0	0	0	50	1
10	0	1	1	0	40	0
11	0	1	1	0
12	0	0	1	0	70	1
13	0	1	1	1	55	0
14	0	1	1	1	45	0
15	1	1	1	1	60	0
16	0	1	1	1	70	0
17	1	1	1	0	60	1
18	1	1	1	1	80	0
19	0	1	1	1	55	0
20	0	1	0	0	40	0
Group 5	Pair 1	Pair 2	Regular Store	Regular cereal	Age	Gender
1	0	1	1	1	20	0
2	1	1	1	1	20	0
3	0	1	0	0	40	1
4	1	1	0	1	70	0
5	0	0	1	0
6	1	1	1	1	40	1
7	1	1	1	1	40	1
8	0	1	1	1	20	0
9	1	1	0	1	80	1
10	0	1	0	1	80	1
11	0	0	1	0	20	0
12	0	0	1	0	20	1
13	0	1	1	0	20	0
14	1	1	1	1	80	1
15	0	1	1	1	30	0
16	0	1	0	1	20	0
17	0	1	1	1	38	0
18	0	1	1	1	40	0
19	1	1	1	0	26	0
20	1	1	1	0	40	0
Group 6	Pair 1	Pair 2	Regular Store	Regular cereal	Age	Gender
1	1	1	0	1	35	1
2	1	0	1	1	40	0
3	1	0	1	1	70	0
4	1	1	1	1	40	0
5	0	1	0	0	30	0
6	1	1	1	0	21	0
7	1	0	1	1	65	0
8	1	1	1	0	20	1
9	1	1	1	0	22	0
10	1	1	1	0	45	0
11	1	1	0	0	60	1
12	1	1	0	1	70	1
13	1	1	1	1	50	1
14	1	1	1	0	60	1
15	1	1	1	1	60	0
16	0	0	1	1	30	0
17	1	0	1	1	45	0
18	1	1	1	0	60	0
19	1	0	1	0	60	0
20	1	0	1	0	20	1
Group 7	Pair 1	Pair 2	Regular Store	Regular cereal	Age	Gender
1	0	1	1	1	20	0
2	1	0	1	1	50	0
3	1	0	1	0	25	0
4	1	0	1	1	80	0
5	1	1	1	1	26	0
6	1	1	1	0	50	0
7	0	1	1	0	23	0
8	1	0	1	1	20	0
9	1	0	1	1	40	1
10	1	0	1	0
11	0	1	1	1	65	0
12	0	1	1	1	70	1
13	1	0	1	1	80	0
14	1	1	1	0	50	1
15	1	0	1	0
16	1	0	0	1	30	0
17	1	1	1	0	20	0
18	0	0	1	0	20	1
19	0	1	1	1	20	1
20	1	0	1	0	20	0
Group 8	Pair 1	Pair 2	Regular Store	Regular cereal	Age	Gender
1	1	1	1	1
2	1	0	1	1
3	1	0	1	1	25	1
4	1	0	1	0	22	1
5	1	0	1	0	20	0
6	1	0	1	1	30	0
7	1	0	1	0
8	1	0	1	1	45	0
9	1	1	1	0	60	1
10	0	0	1	1	50	0
11	0	0	1	1	40	1
12	1	1	1	0	20	0
13	0	1	1	1	20	0
14	1	1	1	0	23	0
15	0	1	1	0	80	0
16	0	0	1	1	20	0
17	0	0	1	0	40	0
18	1	0	1	1	80	0
19	1	0	1	0	20	0
20	1	1	1	0	20	0
Group 9	Pair 1	Pair 2	Regular Store	Regular cereal	Age	Gender
1	1	1	0	0	20	0
2	1	1	1	1	60	0
3	1	0	1	0	20	1
4	0	1	1	1	30	0
5	1	0	1	0	19	0
6	0	0	1	0	20	1
7	0	1	1	0	60	0
8	1	1	1	1	50	0
9	1	1	0	0	30	0
10	1	1	0	1	30	1
11	1	0	1	1	35	0
12	0	1	1	1	40	1
13			1	1	50	0
14	1	1	1	1	80	1
15	1	1	0	1	80	1
16	1	0	1	1	20	0
17	1	0	1	1
18	0	1	1	1	50	0
19	0	0	1	1	80	0
20	1	1	0	0	50	0
Group 10	Pair 1	Pair 2	Regular Store	Regular cereal	Age	Gender
1	1	0	1	1	25	0
2	0	1	1	1	20	0
3	0	0	1	1	30	0
4	0	1	1	1	45	0
5	0	0	1	1	70	0
6	0	0	1	1	45	0
7	1	0	1	1	20	0
8	1	0	1	0	21	0
9	1	1	1	0	20	0
10	1	0	1	1	60	1
11	0	0	1	1	70	1
12	1	1	1	1	20	1
13	1	1	1	0	55	0
14	1	1	1	0	40	0
15	1	0	1	1	70	0
16	0	1	1	1	50	0
17	1	0	1	1	20	0
18	1	0	1	1	55	0
19	0	1	0	0	17	0
20	1	1	1	0	55	0

## Sheet: Center City 2
	Code	Code	Code	Code	Code	Code
Group1	A = 0 B= 1	A = 0 B= 1	1 = yes 0 = no	1 = yes 0 = no	Direct entry	1 = male 0 = fem
1	Pair 1	Pair 2	Regular Store	Regular cereal	Age	Gender
2	0	1	1	1	75	0
3	1	1	1	1	15	1
4	0	0	1	1	25	1
5	0	0	1	0	60	0
6	1	1	0	0	20	1
7	1	1	1	0	18	1
8	1	1	1	0	30	1
9	0	0	1	1	35	1
10	0	0	1	1	20	1
11	1	1	1	1	20	0
12	1	0	1	1	70	1
13	0	0	1	0	21	1
14	0	0	1	0	20	1
15	0	1	1	1	40	0
16	1	1	0	0	60	0
17	0	0	1	1	20	1
18	0	1	1	1	25	1
19	0	0	1	1	25	1
20	0	0	1	1	27	0
Group 2
1	Pair 1	Pair 2	Regular Store	Regular cereal	Age	Gender
2	1	1	1	0
3	0	0	1	1	30	0
4	1	1	1	0	60	1
5	0	0	1	0	40	0
6	0	1	1	1	60	1
7	0	1	0	0
8	0	1	1	0	55	0
9	0	1	1	1	24	0
10	1	1	1	1	50	1
11	1	1	1	0	23	0
12	1	1	1	1	53	0
13	0	1	1	1	20	0
14	1	1	1	1	80	0
15	0	0	1	0	37	0
16	0	1	1	0	24	0
17	0	1	1	0	20	0
18	0	1	1	0	21	0
19	0	0	1	0	20	0
20	1	0	1	0	40	0
	1	1	1	1	21	1
Group 3
1	Pair 1	Pair 2	Regular Store	Regular cereal	Age	Gender
2	0	1	1	0	20	0
3	0	1	1	0	50	0
4	1	0	1	1	40	0
5	1	1	1	1	40	0
6	1	0	1	1
7	0	1	1	1	50	0
8	0	1	1	1	40	0
9	1	1	1	0	50	0
10	1	1	1	0	45	0
11	0	0	1	1	40	0
12	1	1	1	0	30	1
13	0	1	1	0	20	0
14	1	1	1	1
15	1	1	1	1	18	1
16	1	1	1	0
17	0	1	0	0	60	1
18	1	0	1	0	20	0
19	0	1	1	1	40	0
20	1	0	1	0	55	0
	0	0	1	1	30	0
Group 4
1	Pair 1	Pair 2	Regular Store	Regular cereal	Age	Gender
2	0	1	1	0	60	0
3	0	0	1	1	40	1
4	0	1	1	0	25	1
5	0	0	1	1	20	0
6	0	0	1	1
7	1	1	1	1	20	0
8	0	1	1	1	60	1
9	1	0	1	1	27	1
10	0	1	1	1	21	0
11	0	0	1	1
12	0	0	1	0	21	1
13	1	1	1	1	21	1
14	0	0	1	1	21	0
15	1	1	1	0	60	0
16	0	1	1	1	26	0
17	1	1	1	1	20	1
18	0	0	1	1	30	0
19	1	1	1	0	50	0
20	0	0	1	1	45	0
	1	1	0	0	70	1
Group 5
1	Pair 1	Pair 2	Regular Store	Regular cereal	Age	Gender
2	1	1	1	1	65	1
3	1	1	1	0	23	1
4	1	1	1	0	20	1
5	0	1	1	1	27	1
6	0	1	1	0	20	0
7	1	0	1	0
8	1	1	1	0	35	1
9	0	1	1	0	22	0
10	1	1	1	1	25	1
11	1	0	1	1	25	1
12	1	1	1	0	42	0
13	1	1	0	0	40	1
14	1	1	0	1	50	0
15	1	0	1	1	25	0
16	1	1	1	1	70	0
17	0	1	1	0	40	0
18	1	1	1	1	25	1
19	1	0	0	1	40	1
20	1	0	1	0	20	0
	0	1	1	1	50	1
Group 6
1	Pair 1	Pair 2	Regular Store	Regular cereal	Age	Gender
2	1	1	1	1	40	1
3	1	0	1	0	60	1
4	1	1	1	1	20	1
5	1	1	1	1	24	1
6	0	1	1	0	20	1
7	1	0	1	1	57	0
8	1	1	1	1	20	1
9	1	0	1	1
10	1	1	1	1	50	0
11	0	1	1	0	20	0
12	1	1	1	1	50	0
13	1	1	1	1	35	1
14	1		1	0	20	1
15	1	1	1	0	20	0
16	0	1	1	0	50	1
17	0	0	1	0	47	0
18	0	1	1	0	50	1
19	1	1	1	1	50	0
20	0	1	1	1	25	1
	1	1	1	1	40	0
Group 7
1	Pair 1	Pair 2	Regular Store	Regular cereal	Age	Gender
2	1	1	1	1	40	0
3	1	1	1	0
4	1	1	1	0	21	0
5	0	1	1	0	40	0
6	0	1	1	1	40	0
7	1	1	1	0	65	0
8	0	0	1	1	27	0
9	1	0	1	0	60	1
10	0	0	1	1	50	0
11	1	1	1	1	70	0
12	1	1	1	1	50	1
13	0	1	1	1
14	0	1	1	1	30	1
15	0	0	1	1	20	0
16	1	0	1	0	20	0
17	0	1	1	0	45	1
18	0	0	1	0
19	0	1	1	1	30	1
20	0	1	1	1	37	0
	0	0	1	1	18	0
Group 8
1	Pair 1	Pair 2	Regular Store	Regular cereal	Age	Gender
2	0	1	1	0	75	0
3	0	0	0	0
4	1	1	1	0	20	1
5	1	0	1	1	60	0
6	0	1	1	0
7	0	1	0	1	60	0
8	0	1	0	0	40	0
9	0	0	1	0	25	0
10	0	1	1	1	20	0
11	0	1	1	0	20	1
12	1	1	0	1	30	0
13	1	1	1	1	80	1
14	1	1	1	0	25	1
15	0	1	1	0	25	1
16	1	0	1	0	65	0
17	1	1	1	1	20	0
18	1	1	1	1	20	1
19	1	1	1	0	25	1
20	1	1	1	0	30	1
	1	0	1	1	25	0
Group 9
1	Pair 1	Pair 2	Regular Store	Regular cereal	Age	Gender
2	0	1	1	1	50	0
3	1	1	1	0	50	1
4	1	1	1	0	50	1
5	0	1	1	0	20	0
6	0	1	1	1	25	0
7	0	1	1	1	26	0
8	0	1	0	1	30	0
9	0	0	1	0	20	1
10	0	1	1	1	21	1
11	1	1	0	1	40	0
12	0	1	1	0	25	0
13	1	1	1	0	70	1
14	1	1	1	0	20	1
15	1	1	1	0	40	1
16	1	1	1	1	45	0
17	1	0	1	0	20	1
18	1	1	1	0	45	0
19	0	1	1	1	22	1
20	1	1	1	0	30	1
	1	1	1	0	21	1
Group 10
1	Pair 1	Pair 2	Regular Store	Regular cereal	Age	Gender
2	0	1	0	0	30	1
3	0	0	1	0	27	0
4	0	0	1	1	30	0
5	1	1	1	1	70	1
6	0	1	1	0	20	0
7	1	1	1	1	20	1
8	1	1	1	1	21	1
9	1	1	1	0	20	1
10	1	1	1	1	40	1
11	0	1	1	1	40	0
12	1	1	1	0	32	0
13	1	0	1	1
14	0	1	1	0	30	0
15	1	1	1	1	30	0
16	1	1	1	0	22	1
17	0	1	1	1	24	1
18	1	1	1	0	23	1
19	1	1	1	1	20	1
20	0	1	1	1	47	1
	0	0	1	1	40	1

## Sheet: Gardens 1
	Code	Code	Code	Code	Code	Code
Group1	A = 0 B= 1	A = 0 B= 1	1 = yes 0 = no	1 = yes 0 = no	Direct entry	1 = male 0 = fem
1	Pair 1	Pair 2	Regular Store	Regular cereal	Age	Gender
2	1	1	0	1	45	0
3	0	0	1	1	50	0
4	1	1	1	1	55	1
5	0	1	1	1	27	0
6	1	1	1	0	26	1
7	1	1	1	1	75	0
8	0	1	0	0	40	0
9	0	1	1	1	40	0
10	1	1	1	0	60	1
11	1	0	1	0	20	1
12	0	1	1	1	60	0
13	0	0	1	0	58	0
14	0	1	1	1	57	1
15	0	1	1	1	38	0
16	0	1	1	1	32	1
17	0	0	1	1	35	0
18	0	1	1	1	25	0
19	0	1	1	1	50	0
20	1	1	0	0	60	1
	0	1	1	1	21	0
Group 2
1	Pair 1	Pair 2	Regular Store	Regular cereal	Age	Gender
2	0	1	1	1	50	0
3	1	1	1	1	50	0
4	0	1	1	0	21	0
5	0	1	1	0	25	1
6	1	0	0	0	25	0
7	1	0	0	1	80	1
8	0	1	1	1	70	0
9	0	1	1	1	21	1
10	1	1	1	0	25	1
11	1	1	0	1	30	0
12	1	1	1	1	45	0
13	1	0	0	1	65	1
14	0	1	1	0	65	1
15	0	1	1	0	19	0
16	1	1	0	1	45	1
17	0	0	1	0
18	1	1	1	0	22	1
19	0	1	1	1	48	0
20	1	0	1	0	25	1
	1	0	1	0	20	1
Group 3
1	Pair 1	Pair 2	Regular Store	Regular cereal	Age	Gender
2	1	1	1	0	20	0
3	0	0	1	1	23	0
4	0	0	1	0	25	1
5	0	1	1	0	28	0
6	1	1	1	0	60	1
7	1	0	1	1	65	1
8	0	1	1	1	60	0
9	1	0	1	1	65	1
10	0	0	1	0	40	0
11	0	1	1	1	23	0
12	1	1	1	0	23	1
13	0	1	1	1	28	1
14	0	1	1	0	35	1
15	1	0	1	1	38	0
16	1	0	1	1	22	0
17	1	1	1	0	21	0
18	1	1	0	1	40	0
19	1	0	1	0	70	1
20	1	0	1	0	20	1
	1	1	1	0	23	1
Group 4
1	Pair 1	Pair 2	Regular Store	Regular cereal	Age	Gender
2	0	0	1	1	75	0
3	1	1	1	1	40	0
4	0	0	1	1	75	1
5	1	0	1	1	25	1
6	1	1	1	1	25	0
7	1	1	1	0	26	1
8	0	0	1	1	35	0
9	1	1	1	1	70	1
10	0	1	1	1	65	0
11	1	0	1	0	25	1
12	0	0	0	0	70	0
13	0	0	1	1	40	0
14	1	0	0	1	40	0
15	0	1	1	1	25	1
16	0	1	1	1	33	0
17	0	0	1	1	55	0
18	1	1	1	1	65	0
19	0	1	1	0	50	0
20	1	0	1	1	38	0
	1	0	1	1	27	1
Group 5
1	Pair 1	Pair 2	Regular Store	Regular cereal	Age	Gender
2	0	1	1	0	70	1
3	1	1	1	1	75	0
4	0	1	1	0	38	0
5	1	1	1	1	25	1
6	0	1	1	0	23	0
7	0	0	1	0	25	0
8	0	0	1	0	35	0
9	0	1	1	1	75	1
10	1	1	1	0	45	0
11	1	1	1	0	20	0
12	1	1	1	1	75	1
13	1	1	1	1	23	0
14	0	1	1	0	30	0
15	0	0	1	1	55	1
16	0	1	1	1	30	0
17	0	1	1	1	60	0
18	1	1	1	1	50	0
19	0	1	1	1	75	0
20	1	1	1	1	40	1
	0	0	1	0	24	1
Group 6
1	Pair 1	Pair 2	Regular Store	Regular cereal	Age	Gender
2	1	0	1	1	37	0
3	0	0	1	1	38	0
4	0	0	1	1	27	0
5	0	0	1	1	30	1
6	1	1	1	0	45	1
7	1	1	0	1	21	1
8	1	1	0	1	22	1
9	0	1	1	1	50	1
10	0	0	0	1	40	1
11	1	1	1	1	57	0
12	1	1	1	1	22	1
13	1	0	1	0	40	0
14	1	0	1	1	23	0
15	1	0	1	0	60	0
16	1	1	1	1	19	1
17	1	0	0	1	22	0
18	1	1	1	1	62	0
19	0	0	1	1	20	0
20	1	0	1	0	20	0
	0	0	1	1	80	0
Group 7
1	Pair 1	Pair 2	Regular Store	Regular cereal	Age	Gender
2	1	0	1	1	25	0
3	1	1	1	1	40	0
4	1	1	1	1	60	1
5	0	0	1	1	22	1
6	1	1	0	0
7	1	1	1	1	25	0
8	1	1	1	1	23	0
9	1	1	1	1	40	0
10	1	0	1	1	60	0
11	1	1	1	1	21	0
12	1	1	1	0	30	0
13	0	1	1	1	23	0
14	1	0	1	1	25	1
15	1	0	1	0	21	1
16	1	1	1	0	22	0
17	0	1	0	0	53	0
18	1	1	1	1	20	0
19	1	1	1	0	22	0
20	0	0	1	0	35	1
	1	0	0	1	24	0
Group 8
1	Pair 1	Pair 2	Regular Store	Regular cereal	Age	Gender
2	1	0	1	0	80	0
3	0	1	1	0	25	1
4	1	1	0	1	70	0
5	1	0	1	1	22	0
6	0	1	1	1	50	0
7	1	1	1	1	30	0
8	1	1	1	0	19	1
9	1	1	0	0	23	1
10	1	0	0	1	60	0
11	0	0	1	1	21	1
12	1	0	1	0	23	0
13	1	0	1	1	62	0
14	1	0	1	0	80	0
15	0	1	1	1	48	1
16	0	0	1	1	45	1
17	0	0	1	0	22	0
18	0	1	1	1	50	0
19	1	1	1	0	40	1
20	1	1	1	1	50	0
	0	0	1	1	55	0
Group 9
1	Pair 1	Pair 2	Regular Store	Regular cereal	Age	Gender
2	0	0	1	1	55	0
3	1	0	1	1	35	1
4	1	1	1	1	22	0
5	1	1	1	1	41	0
6	1	1	1	0	22	0
7	1	1	0	0	70	1
8	1	0	0	0	50	0
9	1	0	1	1	75	0
10	1	0	1	1	45	0
11	1	1	1	0	23	0
12	1	0	0	0	37	0
13	0	0	1	1	20	0
14	0	0	1	1	36	0
15	0	0	1	1	26	0
16	1	0	1	0	26	1
17	1	1	0	1	50	0
18	1	0	1	1	38	0
19	1	1	1	1	35	1
20	1	0	1	1	20	1
	1	1	1	0	68	1
Group 10
1	Pair 1	Pair 2	Regular Store	Regular cereal	Age	Gender
2	0	0	1	1	19	0
3	0	0	0	0	21	0
4	1	1	1	1	67	0
5	1	0	1	1	21	0
6	1	1	0	1	70	0
7	1	1	1	0	43	0
8	1	0	1	1	38	0
9	0	0	1	1
10	1	0	1	1	21	1
11	1	1	1	0	75	1
12	0	1	1	1	25	1
13	0	0	1	1	40	0
14	1	1	1	1	70	0
15	0	0	1	1	26	1
16	1	1	1	1	48	0
17	1	0	1	1	55	0
18	0	1	0	1	21	0
19	0	1	1	1	21	0
20	1	1	0	0	55	0
	0	1	1	0	40	0

## Sheet: Gardens 2
	Code	Code	Code	Code	Code	Code
	A = 0 B= 1	A = 0 B= 1	1 = yes 0 = no	1 = yes 0 = no	Direct entry	1 = male 0 = fem
Group1	Pair 1	Pair 2	Regular Store	Regular cereal	Age	Gender
1	1	1	1	1	22	1
2	0	1	1	1	50	1
3	0	0	1	0	20	1
4	0	1	1	1	38	0
5	1	1	1	1	65	0
6	0	1	1	1	40	0
7	1	1	0	0	55	1
8	0	1	1	1	26	0
9	1	1	1	1	43	0
10	0	1	1	1	60	0
11	1	0	1	1	85	1
12	1	1	1	1	50	1
13	1	1	1	0	22	0
14	1	1	1	0	80	1
15	0	0	1	1	70	1
16	0	1	1	1	40	0
17	0	0	1	1	25	0
18	1	1	1	0	20	1
19	0	1	1	1	35	0
20	0	1	0	1	40	0
Group 2	Pair 1	Pair 2	Regular Store	Regular cereal	Age	Gender
1	0	1	1	0	30	0
2	0	1	1	1	22	0
3	1	0	1	0	23	0
4	1	1	1	1	88	0
5	1	1	0	0	25	1
6	0	0			21	0
7	0	0	1	1	77	0
8	1	1	1	0	58	0
9	1	1	1	1	21	1
10	0	1	1	1	21	1
11	0	0	0	0	23	0
12	0	0	1	1	45	0
13	0	1	1	1	35	0
14	0	0	1	1	30	0
15	0	1	1	1	21	0
16	0	1	1	1	25	0
17	1	1	1	1	50	1
18	0	1	1	0	80	0
19	1	1	1	0	21	1
20	1	1	1	0	21	1
Group 3	Pair 1	Pair 2	Regular Store	Regular cereal	Age	Gender
1	1	0	1	0	23	1
2	1	0	1	0	30	0
3	0	0	1	0	45	1
4	1	1	1	0	19	1
5	1	0	1	0	22	1
6	0	0	1	0	52	0
7	1	1	0	1	55	1
8	0	0	1	0	70	0
9	1	1	1	0	25	1
10	1	1	1	1	21	1
11	0	0	1	1	75	0
12	1	1	1	0	21	1
13	0	0	1	1	21	1
14	0	1	1	0	22	0
15	0	0	1	0	22	1
16	0	1	1	1	67	0
17	1	1	0	1	31	1
18	1	0	1	0	48	1
19	0	1	1	1	19	1
20	0	1	1	0	28	0
Group 4	Pair 1	Pair 2	Regular Store	Regular cereal	Age	Gender
1	1	1	1	1	50	0
2	1	1	1	0	60	0
3	0	1	1	0	26	0
4	0	1	1	1	25	1
5	0	0	0	0	70	0
6	0	1	1	0	21	1
7	1	1	1	0	20	1
8	1	0	1	0	23	1
9	1	0	1	0	22	1
10	1	1	1	1	24	1
11	0	0	1	0	65	0
12	1	1	1	0	65	0
13	0	1	1	1	78	0
14	0	0	1	1	85	1
15	0	1	1	1	80	0
16	0	0	1	1	40	0
17	1	1	1	1	26	0
18	0	0	1	1	23	1
19	1	1	1	0	80	1
20	0	1	1	0	19	0
Group 5	Pair 1	Pair 2	Regular Store	Regular cereal	Age	Gender
1	0	0	1	1	38	2
2	1	1	1	1	44	1
3	1	0	1	0	21	1
4	0	1	1	1	22	1
5	0	1	1	1	25	0
6	0	1	0	1	57	1
7	1	0	1	1	32	1
8	0	1	1	1	50	1
9	1	0	1	1	22	0
10	1	1	1	1	21	1
11	1	0	1	0	22	0
12	0	1	1	0	80	1
13	0	0	1	0	22	0
14	0	1	1	0	22	0
15	1	1	1	0	23	1
16	0	1	1	0	25	0
17	0	0	1	1	43	0
18	0	1	0	1	38	0
19	0	1	1	0	38	0
20	0	1	1	0	80	1
Group 6	Pair 1	Pair 2	Regular Store	Regular cereal	Age	Gender
1	1	0	1	0	19	0
2	0	0	1	0	20	0
3	0	0	1	0	23	1
4	1	1	1	0	23	1
5	0	0	1	1	50	0
6	1	0	1	0	25	0
7	1	1	1	1	23	1
8	1	1	1	0	22	0
9	1	0	1	0	24	0
10	1	1	1	0	23	1
11	1	1	1	1	20	1
12	0	1	1	1	22	0
13	0	0	1	1	58	0
14	1	0	1	1	50	1
15	1	1	1	1	25	1
16	0	0	1	0	40	1
17	1	0	1	0	34	1
18	1	0	1	0	56	0
19	1	1	1	1	20	1
20	1	0	1	0	63	0
Group 7	Pair 1	Pair 2	Regular Store	Regular cereal	Age	Gender
1	1	1	1	0	23	1
2	1	1	0	1	56	0
3	1	0	1	0	24	1
4	0	0	0	1	32	1
5	1	1	1	1	26	0
6	1	1	1	1	21	1
7	1	0	1	0	50	0
8	0	0	1	1	21	0
9	0	0	1	0	21	0
10	1	1	1	0	21	1
11	1	0	1	1	21	1
12	1	1	1	1	23	0
13	0	1	1	1	21	1
14	0	0	1	1	22	1
15	1	1	1	0	28	1
16	1	1	0	1	30	1
17	0	0	1	0	19	0
18	1	0	1	0	20	0
19	1	0	1	0	20	0
20	0	0	1	1	65	0
Group 8	Pair 1	Pair 2	Regular Store	Regular cereal	Age	Gender
1	1	1	0	0	36	1
2	0	1	0	0	23	0
3	1	0	1	1	19	1
4	1	1	1	0	20	1
5	0	0	0	1	42	0
6	0	1	1	0	22	1
7	1	0	1	0	23	1
8	1	1	1	0	26	1
9	1	1	1	1	50	1
10	0	1	1	1	35	0
11	0	0	1	0	28	0
12	1	0	1	1	35	0
13	1	1	1	1	48	1
14	0	0	1	0	80	0
15	1	0	1	1	37	1
16	1	0	1	1	50	0
17	1	0	1	0	21	0
18	1	1	1	1	51	0
19	1	1	1	1	21	1
20	0	0	1	0	27	1
Group 9	Pair 1	Pair 2	Regular Store	Regular cereal	Age	Gender
1	1	0	1	1	75	0
2	1	1	1	1	40	0
3	0	0	1	1	20	1
4	0	0	1	1	23	1
5	1	1	1	0	22	0
6	1	0	1	0	20	0
7	1	1	1	1	45	0
8	1	1	1	0	22	1
9	1	0	1	1	23	0
10	1	1	0	0	19	1
11	1	1	0	0	21	1
12	1	1	1	0	39	1
13	1	1	1	0	19	0
14	1	1	1	0	21	1
15	1	1	1	1	21	1
16	1	1	1	1	28	1
17	1	0	1	1	24	0
18	1	0	1	1	20	1
19	0	0	1	1	22	1
20	1	1	0	0	20	1
Group 10	Pair 1	Pair 2	Regular Store	Regular cereal	Age	Gender
1	1	0	1	0	28	0
2	0	0	1	0	52	1
3	0	0	1	0	19	1
4	0	0	0	1	65	1
5	1	0	1	1	38	0
6	0	0	0	1	23	1
7	1	0	1	1	49	0
8	1	1	1	0	24	1
9	1	0	1	1	40	0
10	0	0	1	0	22	1
11	1	1	1	0	23	1
12	1	0	1	1	24	0
13	1	1	0	1	25	1
14	1	0	1	1	19	1
15	1	1	1	1	50	0
16	0	0	1	1	18	1
17	1	1	1	0	22	1
18	0	1	1	1	24	0
19	1	1	0	1	24	1
20	1	0	1	1	37	0

## Sheet: Fendalton 
Ffe
	Code	Code	Code	Code	Code	Code
	A = 0 B= 1	A = 0 B= 1	1 = yes 0 = no	1 = yes 0 = no	Direct entry	1 = male 0 = fem
Group1	Pair 1	Pair 2	Regular Store	Regular cereal	Age	Gender
1	1	0	1	0	72	0
2	0	0	0	0	72	0
3	0	1	1	1	40	0
4	0	0	1	1	50	0
5	1	0	1	1	70	1
6	1	1	1	0	75	0
7	0	1	1	0	30	0
8	0	1	1	1	38	0
9	0	1	1	0	65	0
10	0	1	1	1	70	0
11	1	1	1	1	70	0
12	0	1	1	1	40	0
13	0	1	1	1	45	0
14	0	1	0	0	35	1
15	1	1	1	1	60	0
16	0	0	1	1	38	1
17	0	0	1	1	63	0
18	0	0	1	1	70	0
19	1	0	0	0	60	0
20	0	1	1	0	27	1
Group 2	Pair 1	Pair 2	Regular Store	Regular cereal	Age	Gender
1	1	1	0	1	40	0
2	1	1	0	1	65	1
3	1	1	1	0	60	0
4	0	0	1	1	35	0
5	0	0	1	0	45	0
6	0	1	1	0	65	0
7	0	1	1	1	65	0
8	0	1	1	0	50	0
9	0	1	1	0	45	0
10	0	0	1	0	20	0
11	1	1	1	1	70	1
12	0	1	1	0	35	0
13	0	1	1	0	50	0
14	1	1	1	1	72	0
15	1	1	1	0	70	0
16	0	0	1	1	70	0
17	0	1	1	1	60	0
18	0	0	1	1	70	0
19	0	1	1	1	29	0
20	0	1	0	1
Group 3	Pair 1	Pair 2	Regular Store	Regular cereal	Age	Gender
1	1	1	1	1	50	0
2	1	1	1	0	20	0
3	1	1	1	1	45	0
4	0	1	1	1	38	0
5	0	1	1	1	55	1
6	1	1	1	1	75	1
7	0	0	1	1	70	1
8	1	1	1	1	75	1
9	0	1	0	0	22	0
10	1	0	0	1	57	0
11	0	0	1	1	20	1
12	0	0	1	0	20	0
13	0	1	1	0	35	0
14	0	1	1	1	60	0
15	1	1	1	1	60	0
16	0	1	0	0	19	0
17	1	1	1	1	40	0
18	0	0	1	1	35	0
19	0	0	1	0	35	0
20	1	1	1	0	40	0
Group 4	Pair 1	Pair 2	Regular Store	Regular cereal	Age	Gender
1	1	1	1	0	60	0
2	1	1	1	1	40	1
3	1	1	1	1	60	0
4	0	1	1	1	65	0
5	1	1	1	1	19	0
6	0	1	1	0	20	1
7	0	1	1	0	25	0
8	0	1	1	1	70	0
9	0	1	1	0
10	0	1	1	1	20	1
11	1	1	1	0	17	1
12	0	0	1	0	33	0
13	1	1	1	0	20	0
14	0	0	1	1	70	0
15	0	0	1	1	40	0
16	0	0	1	1	50	0
17	0	0	1	0	70	0
18	0	0	1	0	65	0
19	1	1	1	1	20	0
20	0	1	1	0	65	0
Group 5	Pair 1	Pair 2	Regular Store	Regular cereal	Age	Gender
1	0	1	1	1	60	0
2	0	1	1	1	22	1
3	1	1	0	1	60	1
4	1	1	0	0	70	0
5	1	1	0	0	20	1
6	0	0	1	1	30	0
7	0	1	0	1	60	0
8	1	1	1	0	60	1
9	0	1	1	1	60	0
10	1	1	1	1	60	1
11	0	1	1	1	65	0
12	0	0	1	1	55	0
13	0	0	1	1	40	0
14	0	1	1	0	40	0
15	0	1	1	0	67	1
16	1	1	1	0	60	1
17	0	1	0	1	33	0
18	1	1	1	1	37	0
19	0	0	1	1	45	0
20	0	1	1	0	50	0
Group 6	Pair 1	Pair 2	Regular Store	Regular cereal	Age	Gender
1	0	1	1	0	70	0
2	1	1	1	1	50	1
3	1	0	1	1	70	0
4	1	0	0	0	32	0
5	1	0	1	1	70	0
6	1	0	0	1	50	0
7	1	0	1	1	25	1
8	0	1	1	0	60	0
9	1	1	1	1	20	0
10	1	1	1	1	38	0
11	1	0	1	1	75	0
12	1	1	1	0	60	0
13	1	1	1	1	60	1
14	1	0	1	1	60	0
15	0	0	1	1	50	0
16	1	0	1	1	60	0
17	1	1	1	1	60	0
18	1	0	1	1	40	0
19	1	0	1	1	50	1
20	1	1	1	1	55	1
Group 7	Pair 1	Pair 2	Regular Store	Regular cereal	Age	Gender
1	1	1	0	1	68	0
2	0	0	0	0	55	1
3	1	1	1	1	35	1
4	0	1	0	0	70	1
5	1	0	1	1	50	0
6	1	1	1	1	60	0
7	1	1	1	0	30	0
8	1	0	1	1	40	0
9	1	1	1	0	18	1
10	1	0	1	0	38	0
11	1	0	1	1	45	0
12	1	0	1	1	75	0
13	0	0	1	1	30	0
14	0	0	1	0	65	0
15	1	0	1	1	60	0
16	0	1	1	1	28	0
17	1	0	1	1	20	0
18	1	0			26	0
19	1	1	1	1	70	0
20	1	0	1	1	65	0
Group 8	Pair 1	Pair 2	Regular Store	Regular cereal	Age	Gender
1	1	0	0	0
2	1	0	1	1	38	0
3	1	1	1	0	26	0
4	1	1	1	1	60	0
5	0	0	1	1	45	0
6	1	1	1	1	40	0
7	1	1	1	1	32	0
8	1	1	0	0	30	1
9	1	0	1	1	38	0
10	1	0	1	1	60	0
11	1	0	1	1	30	0
12	1	0	1	1	40	1
13	1	0	1	0	50	1
14	1	1	1	1	60	0
15	1	0	1	1	60	0
16	0	1	1	1	45	0
17	0	0	1	0	57	1
18	1	1	1	0	60	1
19	0	0	1	0	60	0
20	1	0	1	1	40	0
Group 9	Pair 1	Pair 2	Regular Store	Regular cereal	Age	Gender
1	1	0	0	1	38	0
2	1	1	1	0	40	0
3	0	0	1	0	25	0
4	1	1	1	0	70	1
5	1	0	1	1
6	0	0	1	0	73	0
7	1	0	1	1	49	0
8	1	1	1	1	65	0
9	1	1	1	0	23	1
10	1	0	1	1	40	0
11	1	0	0	0	31	1
12	1	1	1	1	75	0
13	1	0	1	1	50	0
14	1	1	1	0	20	1
15	1	1	1	0	30	0
16	1	0	1	0	68	0
17	1	1	1	1	55	0
18	1	0	1	1	40	0
19	1	1	1	1	50	0
20
Group 10	Pair 1	Pair 2	Regular Store	Regular cereal	Age	Gender
1	1	0	1	1	58	0
2	1	0	0	1
3	1	1	1	1	50	0
4	1	1	1	1	40	0
5	1		1	0	50	0
6	0	0	1	0	60	0
7	1	0	1	0	33	0
8	1	0	1	1
9	1	1	1	1	70	1
10	1	0	1	0	65	0
11	1	1	1	1	56	0
12	1	0	1	1	50	1
13	1	1	0	0	65	0
14	1	0	1	0	50	0
15	1	0	0	0	35	0
16	0	0	1	1	75	0
17	1	1	1	1	55	0
18	1	0	1	1	33	0
19	1	1	1	0	70	1
20	1	1	1	1	70	0

## Sheet: Halswell 
Halswell
	Code	Code	Code	Code	Code	Code
	A = 0 B= 1	A = 0 B= 1	1 = yes 0 = no	1 = yes 0 = no	Direct entry	1 = male 0 = fem
Group1	Pair 1	Pair 2	Regular Store	Regular cereal	Age	Gender
1	0	0	0	1	25	1
2	1	1	0	0	57	0
3	1	1	1	1	27	1
4	0	0	1	1	40	1
5	0	1	0	1	55	0
6	0	1	1	1	35	0
7	0	1	1	0	20	0
8	0	1	1	0	25	0
9	0	0	1	0	70	1
10	0	1	1	1	45	0
11	1	1	0	1	50	0
12	0	0	1	0	40	0
13	0	1	1	1	35	0
14	0	1	1	1	25	0
15	1	1	1	1	45	0
16	0	0	1	1	70	1
17	1	1	0	0	24	0
18	1	1	1	0	20	0
19	0	1	1	1	25	1
20	0	1	1	1	40	0
Group 2	Pair 1	Pair 2	Regular Store	Regular cereal	Age	Gender
1	1	1	1	1	58	0
2	0	1	1	0	65	1
3	0	1	1	0	70	1
4	0	1	1	1	70	0
5	1	1	0	1
6	0	1	1	0	68	0
7	0	1	1	0	48	0
8	1	1	1	1	50	0
9	1	1	0	0	70	0
10	0	1	1	1	70	0
11	1	1	1	1	45	0
12	0	1	1	1	30	0
13	0	0	0	1	39	0
14	0	1	1	1	70	1
15	0	1	1	1	28	0
16	1	1	1	1	70	0
17	0	1	0	1	25	1
18	1	1	0	1	45	0
19	1	1	1	1	30	0
20	1	1	1	1	50	1
Group 3	Pair 1	Pair 2	Regular Store	Regular cereal	Age	Gender
1	1	1	1	1	75	0
2	0	0	1	1	65	0
3	0	1	0	0	18	0
4	1	1	1	1	35	0
5	0	1	1	0	60	1
6	1	0	1	1	35	0
7	0	1	0	1	65	0
8	0	1	1	1	20	0
9	0	1	1	0	40	0
10	0	1	1	1	20	0
11	1	1	1	1	50	0
12	1	1	0	0	50	0
13	1	1	0	1	65	0
14	1	1	1	1	75	0
15	0	1	1	1	60	0
16	0	1	1	1	60	0
17	1	1	1	1	75	0
18	0	1	0	1
19	1	0	1	0	70	0
20	0	1	1	1	70	0
Group 4	Pair 1	Pair 2	Regular Store	Regular cereal	Age	Gender
1	0	0	1	1	25	1
2	0	1	0	1	65	1
3	0	1	1	1	65	0
4	0	1	1	0	45	0
5	0	0	0	1	60	0
6	0	1	1	0	65	0
7	0	1	1	1	30	0
8	0	0	0	1	57	0
9	0	1	1	0	40	0
10	1	1	1	1	65	1
11	0	1	1	1	50	0
12	1	1	1	0	20	1
13	0	1	1	1	30	0
14	0	1	1	0	65	0
15	0	0	1	1	38	0
16	0	0	1	1	60	0
17	1	1	1	1	70	0
18	0	1	0	1	35	0
19	0	1	1	1	60	0
20	0	1	1	1	56	0
Group 5	Pair 1	Pair 2	Regular Store	Regular cereal	Age	Gender
1	1	1	1	1	60	0
2	0	1	1	1	55	0
3	0	1	1	1	65	0
4	1	1	1	1	70	0
5	1	1	1	1	45	0
6	0	0	1	1	60	0
7	1	1	1	0	22	0
8	0	1	1	0	70	1
9	1	1	1	0	28	0
10	0	1	0	0	27	1
11	0	1	0	1	35	0
12	1	0	1	0	30	0
13	1	1	1	1	60	1
14	0	1	1	1	45	0
15	1	1	1	1	60	0
16	0	1	1	1	63	0
17	0	1	1	1	26	0
18	1	1	1	0	36	1
19	1	1	1	1	35	0
20	0	0	1	1	79	1
Group 6	Pair 1	Pair 2	Regular Store	Regular cereal	Age	Gender
1	0	0	1	1	60	0
2	1	0	1	1	30	0
3	1	1	1	1	65	0
4	1	1	1	1	55	0
5	0	0	1	0	45	0
6	1	1	0	1	55	1
7	1	1	0	1	38	1
8	1	0	1	1	60	0
9	1	0	1	1	65	0
10	1	0	1	0	45	0
11	1	0	1	1	70	0
12	1	0	0	0	65	0
13	1	0	1	1	58	0
14	0	0	1	1	65	0
15	1	1	1	0	55	0
16	0	0	1	1	82	1
17	1	1	1	1	58	0
18	0	0	1	1	32	0
19	1	0	1	0	65	0
20	1	1	1	0	38	0
Group 7	Pair 1	Pair 2	Regular Store	Regular cereal	Age	Gender
1	1	0	1	0	35	0
2	1	1	0	0	60	1
3	0	0	1	1	39	0
4	0	1	1	1	70	0
5	1	1	1	1	60	1
6	1	0	1	1	35	0
7	1	1	0	1	50	0
8	1	0	1	1	32	0
9	1	1	0	1	48	0
10	1	0	1	1	60	0
11	0	0	1	1	55	0
12	1	0	1	1	80	0
13	1	0	1	1	48	0
14	0	0	1	1	55	0
15	1	1	1	1	65	1
16	1	0	1	1	30	0
17	1	1	1	0	70	1
18	1	0	1	0	35	0
19	1	0	0	1	40	0
20	0	0	1	1	40	0
Group 8	Pair 1	Pair 2	Regular Store	Regular cereal	Age	Gender
1	1	1	1	1	50	0
2	1	0	1	1	68	1
3	1	0	1	1	45	0
4	1	0	1	1	65	1
5	1	0	1	1	35	0
6	1	0	1	1	71	0
7	1	0	1	1	35	0
8	1	1	1	1	60	1
9	1	0	1	0	60	0
10	1	0	1	1	48	0
11	1	0	1	0	60	0
12	0	0	1	1	35	0
13	1	0	1	1	30	0
14	1	1	1	1	35	0
15	1	0	0	0	21	0
16	1	1	1	1	49	0
17	0	1	1	1	40	0
18	1	1	1	1	68	0
19	1	1	1	1	30	0
20	1	0	0	0	65	0
Group 9	Pair 1	Pair 2	Regular Store	Regular cereal	Age	Gender
1	1	1	1	1	41	0
2	1	1	1	0	45	0
3	1	0	1	1	28	0
4	1	1	1	1	50	0
5	1	0	1	0	25	0
6	1	0	1	1	60	0
7	0	0	1	1	33	0
8	1	0	1	1	38	0
9	0	0	1	0	85	1
10	1	0	0	1	65	0
11	1	1	1	1	65	1
12	0	1	1	1	25	1
13	1	0	1	1	27	1
14	1	1	1	0	30	0
15	1	1	1	0	30	0
16	1	1	1	1	70	1
17	1	0	1	0	55	0
18	0	1	1	0	60	0
19	0	0	1	1	52	0
20	1	0	1	1	69	0
Group 10	Pair 1	Pair 2	Regular Store	Regular cereal	Age	Gender
1	1	0	1	1	60	0
2	0	0	1	1	49	1
3	1	0	1	1	40	0
4	1	1	1	0	35	1
5	1	0	1	0	40	0
6	1	1	1	0	28	0
7	0	0	1	0	20	0
8	0	0	1	1	55	0
9	1	0	1	0	45	0
10	1	1	0	0	55	0
11	1	1	1	1	69	0
12	1	0	1	0	60	1
13	1	1	0	1	45	1
14	0	0	1	1	40	0
15	1	1	1	1	60	1
16	1	0	1	1	45	0
17	0	0	1	0	32	1
18	1	0	1	0	60	0
19	1	1	1	1	50	1
20	1	0	0	1	28	1

## Sheet: Wigram
Wigram
	Code	Code	Code	Code	Code	Code
	A = 0 B= 1	A = 0 B= 1	1 = yes 0 = no	1 = yes 0 = no	Direct entry	1 = male 0 = fem
Group1	Pair 1	Pair 2	Regular Store	Regular cereal	Age	Gender
1	1	1	1	1	40	1
2	0	0	0	1	50	0
3	1	1	1	1	35	1
4	0	1	1	1	20	0
5	0	1	1	0	45	1
6	0	1	1	1	35	0
7	0	1	1	0	30	1
8	1	0	1	0	40	0
9	0	1	1	1	33	1
10	0	1	1	0	23	1
11	1	1	1	1	38	0
12	0	0	1	1	35	0
13	1	1	1	0	33	1
14	0	1	0	1	30	1
15	0	1	1	1	45	1
16	1	1	0	1	45	0
17	0	0	0	1	35	0
18	0	1	1	0	49	0
19	1	1	1	1	70	1
20	0	1	1	0	31	1
Group 2	Pair 1	Pair 2	Regular Store	Regular cereal	Age	Gender
1	0	0	1	1
2	0	1	1	1	25	0
3	0	1	1	1	68	0
4	1	1	1	0	65	0
5	0	1	0	1	65	0
6	0	1	1	0	25	0
7	0	1	0	1	30	0
8	1	1	1	1	60	1
9	1	0	1	0	65	1
10	0	1	1	1	28	1
11	0	1	1	0	30	1
12	0	1	1	1	50	0
13	1	0	1	1	50	0
14	1	0	1	1	30	0
15	0	0	1	1	35	1
16	0	1	1	1	28	0
17	1	1	0	0	45	0
18	0	1	1	1	65	1
19	1	1	0	0	55	0
20	1	0	1	0	65	0
Group 3	Pair 1	Pair 2	Regular Store	Regular cereal	Age	Gender
1	0	1	0	1	30	1
2	0	1	1	0	30	1
3	0	1	1	0	25	0
4	1	0	1	1	28	0
5	0	1	1	0	22	0
6	1	1	1	1	28	1
7	0	1	1	1	44	0
8	0	1	0	0	50	0
9	0	0	1	0	45	0
10	0	1	1	1	45	1
11	0	1	0	1	45	0
12	0	0	0	1	65	0
13	1	1	1	1	33	1
14	1	1	1	1	68	1
15	1	1	1	1	38	0
16	0	1	1	0	25	0
17	1	0	1	1	60	0
18	1	0	1	1	35	1
19	0	1	0	0	45	1
20	0	1	1	1	60	1
Group 4	Pair 1	Pair 2	Regular Store	Regular cereal	Age	Gender
1	0	1	0	0	50	0
2	0	1	1	1	30	0
3	0	1	1	1	50	0
4	0	0	0	0	30	1
5	0	1	1	1	50	1
6	0	0	1	1	38	0
7	1	1	1	0	40	1
8	0	1	1	0	25	0
9	1	0	1	1	28	1
10	0	0	1	1
11	1	0	0	1	72	1
12	0	0	1	0	30	0
13	1	1	1	0	35	1
14	0	1	1	1	73	0
15	1	1	1	1	70	0
16	0	0	1	0	50	0
17	1	1	0	0	30	1
18	0	1	1	0	33	0
19	0	1	1	0	58	0
20	0	0	1	0	40	0
Group 5	Pair 1	Pair 2	Regular Store	Regular cereal	Age	Gender
1	1	1	1	1	30	0
2	0	1	1	1	30	0
3	0	0	1	1	41	1
4	0	1	1	1	40	0
5	0	1	1	1	50	0
6	0	1	1	1	50	0
7	0	1	1	1	28	0
8	1	1	1	0	55	1
9	0	1	1	1	45	0
10	0	1	1	1	60	0
11	0	0	1	0	20	0
12	0	1	1	0	56	0
13	0	1	1	1	49	0
14	1	1	0	0	40	1
15	0	1	0	0	65	0
16	1	1	1	1	43	0
17	1	1	1	1	45	0
18	0	0	1	1	63	0
19	0	1	1	1	40	0
20	0	1	1	1
Group 6	Pair 1	Pair 2	Regular Store	Regular cereal	Age	Gender
1	1	1	1	1	75	1
2	1	1	1	0	28	1
3	1	0	1	1	65	1
4	1	0	1	0	30	0
5	1	0	1	1	45	0
6	1	0	1	1	56	1
7	1	1	1	0	60	1
8	0	0	1	1	40	1
9	1	0	1	1	50	1
10	1	1	1	1	65	1
11	0	0	1	1	49	0
12	1	0	1	1	30	1
13	0	1	1	1	60	0
14	1	1	0	1	35	0
15	1	0	1	1	30	1
16	0	1	1	1	30	0
17	1	1	1	1	65	0
18	1	1	1	1	55	1
19	1	0	1	1	53	0
20	1	1	1	0	25	1
Group 7	Pair 1	Pair 2	Regular Store	Regular cereal	Age	Gender
1	0	0	1	0	30	0
2	1	0	1	1	38	0
3	1	0	1	1	56	0
4	0	0	1	1	25	1
5	1	0	1	1	49	0
6	1	1	1	1	60	1
7	0	0	1	1	30	0
8	1	0	1	0	30	1
9	1	0	1	1	61	0
10	0	0	0	0	20	0
11	1	0	0	0	30	0
12	1	0	1	1	65	0
13	1	0	0	0	44	0
14	1	0	1	0	31	0
15	1	0	0	0	40	1
16	1	0	1	0	30	0
17	0	1	1	1	60	0
18	1	1	1	1	30	0
19	1	1	1	1	24	1
20	1	1	1	0	30	1
Group 8	Pair 1	Pair 2	Regular Store	Regular cereal	Age	Gender
1	1	0	1	0	40	0
2	1	1	1	0	60	0
3	1	0	1	1	35	0
4	1	0	1	1	30	0
5	1	1	1	1	50	0
6	1	0	1	1	70	0
7	1	0	1	1	35	0
8	1	1	1	1	50	0
9	1	1	0	0	20	1
10	1	0	1	1	28	0
11	1	1	0	0	68	1
12	1	0	1	1	50	0
13	0	0	1	1	40	0
14	1	0	1	1	28	0
15	1	0	1	1	60	0
16	1	0	1	1	20	1
17	0	0	1	1	55	0
18	0	0	1	1	60	0
19	1	0	1	1	60	1
20	1	1	1	1	55	0
Group 9	Pair 1	Pair 2	Regular Store	Regular cereal	Age	Gender
1	1	0	1	1
2	1	1	1	1	75	0
3	1	0	1	1	40	1
4	1	0	1	1	40	0
5	1	0	1	1	60	0
6	1	0	1	1	55	0
7	1	0	1	1	60	1
8	1	0	1	1	50	0
9	1	1	1	1
10	0	0	1	1	50	0
11	1	1	1	1	52	1
12	1	1	1	1	30	0
13	1	0	1	1	38	0
14	1	0	0	0	18	0
15	0	0	0	0	55	0
16	1	1	1	1	59	0
17	1	0	0	1	55	0
18	1	0	0	0	19	0
19	0	1	1	1	30	0
20	0	1	1	0	20	0
Group 10	Pair 1	Pair 2	Regular Store	Regular cereal	Age	Gender
1	1	1	1	0	60	0
2	0	0	1	1	30	1
3	1	0	1	1
4	1	0	1	1	35	0
5	1	0	1	1	46	0
6	0	0	1	1	40	1
7	0	0	1	1	35	1
8	0	0	1	1	61	0
9	1	1	1	1	38	0
10	1	1	1	1	40	0
11	1	0	1	0	27	0
12	1	0	1	1	35	0
13	1	0	1	1	20	0
14	1	1	1	0	30	1
15	1	0	1	1	24	0
16	1	0	0	0	45	0
17	1	1	0	1	47	0
18	1	0	0	0	40	1
19	1	1	0	0	30	1
20	1	0	1	1	33	1

## Sheet: Stanmore 
Stanmore
	Code	Code	Code	Code	Code	Code
	A = 0 B= 1	A = 0 B= 1	1 = yes 0 = no	1 = yes 0 = no	Direct entry	1 = male 0 = fem
Group1	Pair 1	Pair 2	Regular Store	Regular cereal	Age	Gender
1	0	1	1	0	43	0
2	1	1	1	1	20	1
3	0	1	1	1	70	0
4	0	1	1	0	40	0
5	1	0	1	1	42	0
6	0	1	1	1	27	0
7	1	1	1	1	40	0
8	0	0	1	0	20	1
9	0	0	1	1	35	0
10	0	0	1	0	40	0
11	0	1	1	0	60	0
12	0	0	1	1	40	0
13	1	1	0	1	48	0
14	1	1	0	1	40	0
15	0	0	1	1	45	0
16	0	1	1	1	30	1
17	0	1	0	1	52	0
18	0	1	1	0	45	0
19	0	1	1	1	50	0
20	0	0	1	1	55	0
Group 2	Pair 1	Pair 2	Regular Store	Regular cereal	Age	Gender
1	0	1	0	0
2	0	1	1	0	60	1
3	0	0	1	1	30	1
4	0	0	1	0	75	1
5	1	0	1	1	55	0
6	1	1	0	1	40	0
7	1	1	1	1	49	0
8	0	0	1	0	70	1
9	1	1	1	0	65	0
10	1	1	1	0	40	0
11	0	0	1	0	50	0
12	1	1	1	1	20	0
13	1	1	1	1	40	1
14	0	0	1	0	23	0
15	1	1	1	1	60	1
16	0	1	1	1	43	0
17	0	1	1	1	45	0
18	0	0	1	0	55	0
19	1	1	1	0	60	1
20	0	0	1	1	65	1
Group 3	Pair 1	Pair 2	Regular Store	Regular cereal	Age	Gender
1	0	1	0	1	50	0
2	0	0	1	1	29	0
3	0	0	1	1	40	0
4	0	1	0	1	40	0
5	0	1	1	1	50	0
6	0	0	1	0	45	0
7	1	1	0	0	40	0
8	0	1	1	1	35	0
9	0	1	1	1	65	1
10	0	1	1	1	55	0
11	0	1	1	1	45	0
12	0	1	1	1	30	0
13	1	1	1	1	60	1
14	1	1	1	0	35	1
15	0	1	1	1	69	0
16	0	0	1	1	32	0
17	0	1	1	0
18	1	1	1	1	80	0
19	0	1	1	1	54	1
20	1	1	0	1	60	0
Group 4	Pair 1	Pair 2	Regular Store	Regular cereal	Age	Gender
1	0	1	1	1
2	0	1	1	1
3	1	1	1	0	70	1
4	1	1	1	1	70	0
5	0	1	1	1	34	0
6	1	1	1	1	65	0
7	0	1	0	1	20	0
8	1	1	1	1	49	0
9	0	0	1	1	50	0
10	0	1	1	0	45	0
11	0	1	1	1	52	0
12	0	0	1	0	50	1
13	0	0	1	1	45	0
14	0	1	1	1	24	0
15	0	1	1	1	50	1
16	0	0	1	1	50	1
17	0	1	1	1	65	1
18	1	1	0	1
19	1	1	1	0	70	0
20	1	1	1	1	48	0
Group 5	Pair 1	Pair 2	Regular Store	Regular cereal	Age	Gender
1	0	1	1	0	28	0
2	1	1	0	0
3	0	1	0	1	20	0
4	0	1	1	1	40	0
5	1	1	1	1	45	0
6	1	1	0	1	27	0
7	0	1	1	1
8	0	1	1	1	28	0
9	0	1	1	1	45	0
10	0	1	1	1	30	1
11	0	1	1	1	67	0
12	1	1	0	0	50	0
13	0	0	1	1	40	0
14	1	1	1	1	65	0
15	0	0	1	0	40	0
16	0	0	0	0	30	0
17	0	0	1	0	40	0
18	1	1	0	1	60	0
19	1	0	1	1	60	0
20	0	1	1	1	65	0
Group 6	Pair 1	Pair 2	Regular Store	Regular cereal	Age	Gender
1	0	1	1	0	41	0
2	1	0	1	1	40	0
3	1	0	0	0	55	0
4	0	0	0	0	28	0
5	0	1	1	1	45	1
6	1	0	1	1	75	0
7	1	1	1	0	23	0
8	1	0	1	1	55	0
9	1	0	1	1	50	0
10	1	0	1	1	50	1
11	1	0	1	1	44	0
12	1	0	0	1	70	1
13	1	1	1	0	25	1
14	0	0	1	1	65	1
15	0	0	1	0	37	0
16	1		1	1	50	0
17	0	0	1	1	25	0
18	1	0	0	1	50	0
19	0	0	1	1	47	0
20	1	1	0	0	50	1
Group 7	Pair 1	Pair 2	Regular Store	Regular cereal	Age	Gender
1	0	0	1	1	30	0
2	1	1	1	1	85	0
3	0	0	1	0	20	0
4	1	1	1	1	35	0
5	1	1	1	1	60	0
6	1	0	1	1	65	0
7	1	1	1	0	30	0
8	1	0	0	0	22	1
9	0	0	1	0	42	0
10	0	1	1	1	45	0
11	0	0	1	1	50	0
12	0	1	1	1	49	0
13	1	0	1	1	45	0
14	1	1	1	1	55	0
15	1	0	1	1	40	0
16	1	1	0	0	45	0
17	0	0	1	1	60	0
18	0	0	0	1	35	0
19	1	1	1	1	65	0
20	1	0	1	1	65	1
Group 8	Pair 1	Pair 2	Regular Store	Regular cereal	Age	Gender
1	0	0	0	1	65	0
2	1	0	1	0	51	1
3	0	0	0	0	40	0
4	0	1	0	1	45	0
5	1	0	1	1	45	1
6	1	0	0	1	80	1
7	1	0	1	1	50	0
8	0	1	0	1	20	0
9	1	0	0	1	55	0
10	1	0	0	0	31	1
11	1	0	1	0	25	0
12	1	1	1	1
13	1	1	0	0	40	0
14	0	0	1	1	56	1
15	1	1	1	1	70	1
16	1	0	1	0	70	0
17	1	0	1	0	50	0
18	0	0	1	0	50	1
19	0	0	1	1	55	0
20	0	0	1	0	41	1
Group 9	Pair 1	Pair 2	Regular Store	Regular cereal	Age	Gender
1	1	1	0	0	19	1
2	1	1	0	1	32	0
3	1	0	1	1	65	0
4	1	1	1	1	45	0
5	0	0	1	0	20	0
6	1	0	1	1	55	0
7	1	0	1	1	50	0
8	1	0	1	1	56	1
9	1	0	1	1	45	0
10	1	0	0	1	30	1
11	1	1	0	1	38	1
12	1	0	1	1
13	1	0	1	1	27	0
14	1	0	1	0	55	1
15	1	1	1	1	35	0
16	1	0	1	1	24	1
17	0	0	1	0	25	0
18	1	0	1	1	30	0
19	1	0	1	1	70	1
20	1	1	1	1	35	0
Group 10	Pair 1	Pair 2	Regular Store	Regular cereal	Age	Gender
1	1	1	1	1	35	1
2	1	0	1	0	30	1
3	0	0	0	0	52	0
4	1	0	1	1	58	1
5	0	0	0	1	40	0
6	1	1	1	0	65	1
7	1	1	1	0	35	0
8	1	1	1	0	23	1
9	1	0	0	0	25	0
10	1	1	1	1	28	0
11	1	1	1	0	55	1
12	1	1	1	1	75	0
13	1	1	1	1	52	1
14	0	0	1	1	50	0
15	1	0	1	0	30	0
16	0	1	1	0	40	1
17	0	0	1	0	27	0
18	0	1	1	1	25	0
19	1	0	1	1	28	0
20	1	1	1	0	45	0

## Sheet: Bishopsdale 
Bishopdale
	Code	Code	Code	Code	Code	Code
	A = 0 B= 1	A = 0 B= 1	1 = yes 0 = no	1 = yes 0 = no	Direct entry	1 = male 0 = fem
Group1	Pair 1	Pair 2	Regular Store	Regular cereal	Age	Gender
1	1	1	1	1
2	1	1	0	0	45	1
3	1	1	1	1	50	0
4	1	1	1	1	49	0
5	0	0	1	1	35	0
6	1	1	1	0	60	0
7	0	1	0	1	40	0
8	0	1	1	1	50	1
9	1	1	0	1	65	1
10	0	1	1	0	40	0
11	0	1	1	0	70	0
12	0	1	1	1	70	1
13	0	0	0	1	40	0
14	0	0	1	1	32	0
15	0	1	1	1	45	0
16	0	0	1	1	78	0
17	0	1	1	1	35	0
18	0	1	1	0	48	0
19	0	0	1	1	75	1
20	0	0	0	1	45	0
Group 2	Pair 1	Pair 2	Regular Store	Regular cereal	Age	Gender
1	1	0	1	1	50	0
2	1	1	1	0	65	1
3	1	0	1	0	70	0
4	0	1	1	1	65	0
5	1	0	1	0	25	0
6	0	1	0	1	65	0
7	0	1	1	0	65	1
8	0	1	1	1	45	0
9	1	0	1	0	45	0
10	1	0	1	0	35	0
11	1	1	1	1	25	0
12	0	1	1	1	30	0
13	1	1	1	0	55	1
14	0	0	1	1	70	0
15	0	1	0	1	43	0
16	1	0	1	1	55	0
17	0	1	1	1	38	0
18	1	0	0	0	45	0
19	0	0	0	1	23	1
20	0	1	0	1	65	0
Group 3	Pair 1	Pair 2	Regular Store	Regular cereal	Age	Gender
1	0	1	1	1	65	0
2	0	0	1	1	22	0
3	0	0	1	1	70	0
4	1	1	1	1	70	0
5	0	1	1	1	80	0
6	1	1	1	1	49	0
7	0	1	1	1	50	0
8	0	1	1	1	60	1
9	0	0	1	1	60	0
10	0	0	1	0	60	0
11	0	0	1	1	65	0
12	0	1	1	1	55	0
13	0	1	1	1	80	0
14	0	1	1	1	20	0
15	0	1	1	1	50	0
16	1	1	1	1	30	0
17	1	1	1	1	45	0
18	1	0	0	1	45	0
19	1	1	1	1	60	0
20	0	1	1	1	63	0
Group 4	Pair 1	Pair 2	Regular Store	Regular cereal	Age	Gender
1	0	1	1	1	25	0
2	1	0	1	1	70	0
3	0	0	1	1	60	1
4	0	1	1	1	35	0
5	0	0	1	1	50	0
6	1	1	1	1	70	1
7	0	1	0	1	65	0
8	1	1	1	0	80	0
9	0	1	1	1	55	1
10	0	1	0	0	35	0
11	1	1	1	1	65	0
12	0	1	1	1	43	1
13	0	0	1	0	40	0
14	0	1	1	1	40	0
15	1	1	1	1	63	0
16	0	1	1	1	30	0
17	0	1	1	1	60	0
18	0	1	1	0	60	0
19	0	1	1	0	35	0
20	0	1	1	1	59	0
Group 5	Pair 1	Pair 2	Regular Store	Regular cereal	Age	Gender
1	0	1	1	1	80	0
2	0	0	0	0	60	1
3	1	1	1	1	70	0
4	0	1	1	1	60	0
5	1	1	1	1	60	0
6	0	0	1	1	50	0
7	0	1	1	1	55	0
8	1	0	0	1	60	1
9	1	1	0	1	65	0
10	0	1	1	1	60	0
11	1	1	1	1	80	0
12	1	1	1	0	65	0
13	0	0	1	1	35	0
14	0	1	0	1	55	0
15	0	0	1	1	55	0
16	0	1	1	1	45	0
17	1	1	1	1	40	0
18	1	1	1	1	20	0
19	0	1	1	1	50	0
20	1	1	1	1	60	0
Group 6	Pair 1	Pair 2	Regular Store	Regular cereal	Age	Gender
1	1	1	1	1	65	1
2	1	0	0	1	65	0
3	0	1	1	1	40	0
4	1	1	1	1
5	0	0	1	0	60	0
6	1	0	1	1	57	0
7	0	0	1	1	50	0
8	1	1	1	1	65	1
9	0	0	1	1	65	1
10	0	0	1	1	65	0
11	0	0	1	0	75	1
12	1	1	1	1	25	1
13	0	0	1	1	65	0
14	1	1	1	0	85	1
15	1	1	1	1	78	0
16	1	0	1	0	20	0
17	1	0	1	0	28	0
18	0	1	1	1	80	0
19	1	0	1	0	25	0
20	1	1	1	1	45	0
Group 7	Pair 1	Pair 2	Regular Store	Regular cereal	Age	Gender
1	1	0	1	1	65	0
2	1	1	1	1	75	1
3	1	0	0	1	62	0
4	1	0	1	1	75	1
5	0	0	1	1	80	0
6	1	0	0	0	25	0
7	1	1	1	0	40	1
8	1	0	1	1	65	0
9	0	1	1	1	80	1
10	1	1	1	0	43	0
11	1	0	1	0	40	0
12	1	0	1	1	43	0
13	1	1	1	1	55	0
14	1	1	1	0	23	1
15	0	0	0	0	35	0
16	1	0	1	1	80	0
17	1	1	0	0	30	0
18	1	1	0	0	30	1
19	1	1	1	1	60	0
20	1	0	0	1	36	0
Group 8	Pair 1	Pair 2	Regular Store	Regular cereal	Age	Gender
1	1	0	1	1	39	0
2	0	0	1	1	75	0
3	0	0	1	1	32	0
4	0	0	1	0	20	0
5	1	0	0	1	30	1
6	1	1	0	1	30	1
7	1	0	0	1	80	0
8	1	0	0	1	25	0
9	1	1	1	1	25	1
10	1	1	1	0	25	0
11	1	0	1	0	65	0
12	1	0	1	1	68	0
13	1	1	1	1	65	0
14	0	0	0	1	60	1
15	1	0	0	1	35	1
16	1	1	0	1	25	0
17	1	0	0	1	35	0
18	0	0	1	1	60	1
19	0	0	1	1	35	0
20	1	1	1	1	50	0
Group 9	Pair 1	Pair 2	Regular Store	Regular cereal	Age	Gender
1	1	0	1	1	52	0
2	0	0	1	1	85	0
3	1	1	1	0	65	0
4	1	0	1	1	59	0
5	1	1	1	1	40	0
6	1	1	1	1	62	1
7	0	1	1	0	30	1
8	1	1	1	0	65	1
9	1	0	0	1	20	0
10	1	1	1	1	55	0
11	0	0	1	1	45	0
12	1	0	1	1	18	0
13	0	0	0	1	45	0
14	0	0	1	1	70	0
15	1	0	1	1	80	0
16	0	0	1	1	60	1
17	0	0	1	1	65	0
18	0	0	1	1	55	1
19	1	1	1	0	25	0
20	1	0	1	0	40	0
Group 10	Pair 1	Pair 2	Regular Store	Regular cereal	Age	Gender
1	0	0	1	1	68	0
2	0	0	1	1	69	0
3	1	0	1	1	40	0
4	0	0	1	1	25	0
5	1	1	1	1	32	0
6	1	1	0	1	80	0
7	1	0	1	1	65	0
8	1	1	1	1	80	0
9	0	0	1	1	63	0
10	1	1	1	0	65	0
11	1	1	1	1	70	0
12	1	0	1	0	65	0
13	1	1	1	1	70	0
14	1	1	1	0	65	1
15	1	0	1	0	18	0
16	1	0	1	1	16	0
17	0	1	1	0	44	0
18	1	0	1	1	60	0
19	1	0	1	1	45	0
20	1	0	1	1	55	0

[truncated: 3 more sheets: St. Martins , South City , Ilam ]
